# Supplementary material for: Study on Direct Synthesis of Energy Efficient Multifunctional Polyaniline–Graphene Oxide Nanocomposite and Its Application in Aqueous Symmetric Supercapacitor Devices
Source: PubMed Central journal article supplement (PMC7022722; doi:10.3390/nano10010118), 2020-01-08
Supplement: nanomaterials-10-00118-s001.pdf [file nanomaterials-10-00118-s001.pdf]

# Study on Direct Synthesis of Energy Efficient Multifunctional Polyaniline–Graphene Oxide Nanocomposite and Its Application in Aqueous Symmetric Supercapacitor Devices

Hajera Gul <sup>1</sup>, Anwar-ul-Haq Ali Shah <sup>2</sup>, Ulrike Krewer <sup>3</sup> and Salma Bilal <sup>1,3,\*</sup>

<sup>1</sup> National Centre of Excellence in Physical Chemistry, University of Peshawar, Peshawar 25120, Pakistan; hajeragul11@yahoo.com

<sup>2</sup> Institute of Chemical Sciences, University of Peshawar, Peshawar 25120, Pakistan; anwarulhaqalishah@uop.edu.pk

<sup>3</sup> TU Braunschweig Institute of Energy and Process System Engineering, 38106 Braunschweig, Germany;

\* Correspondence: s.bilal@tu-braunschweig.de; Tel.: +0049-531-391-63651/3030

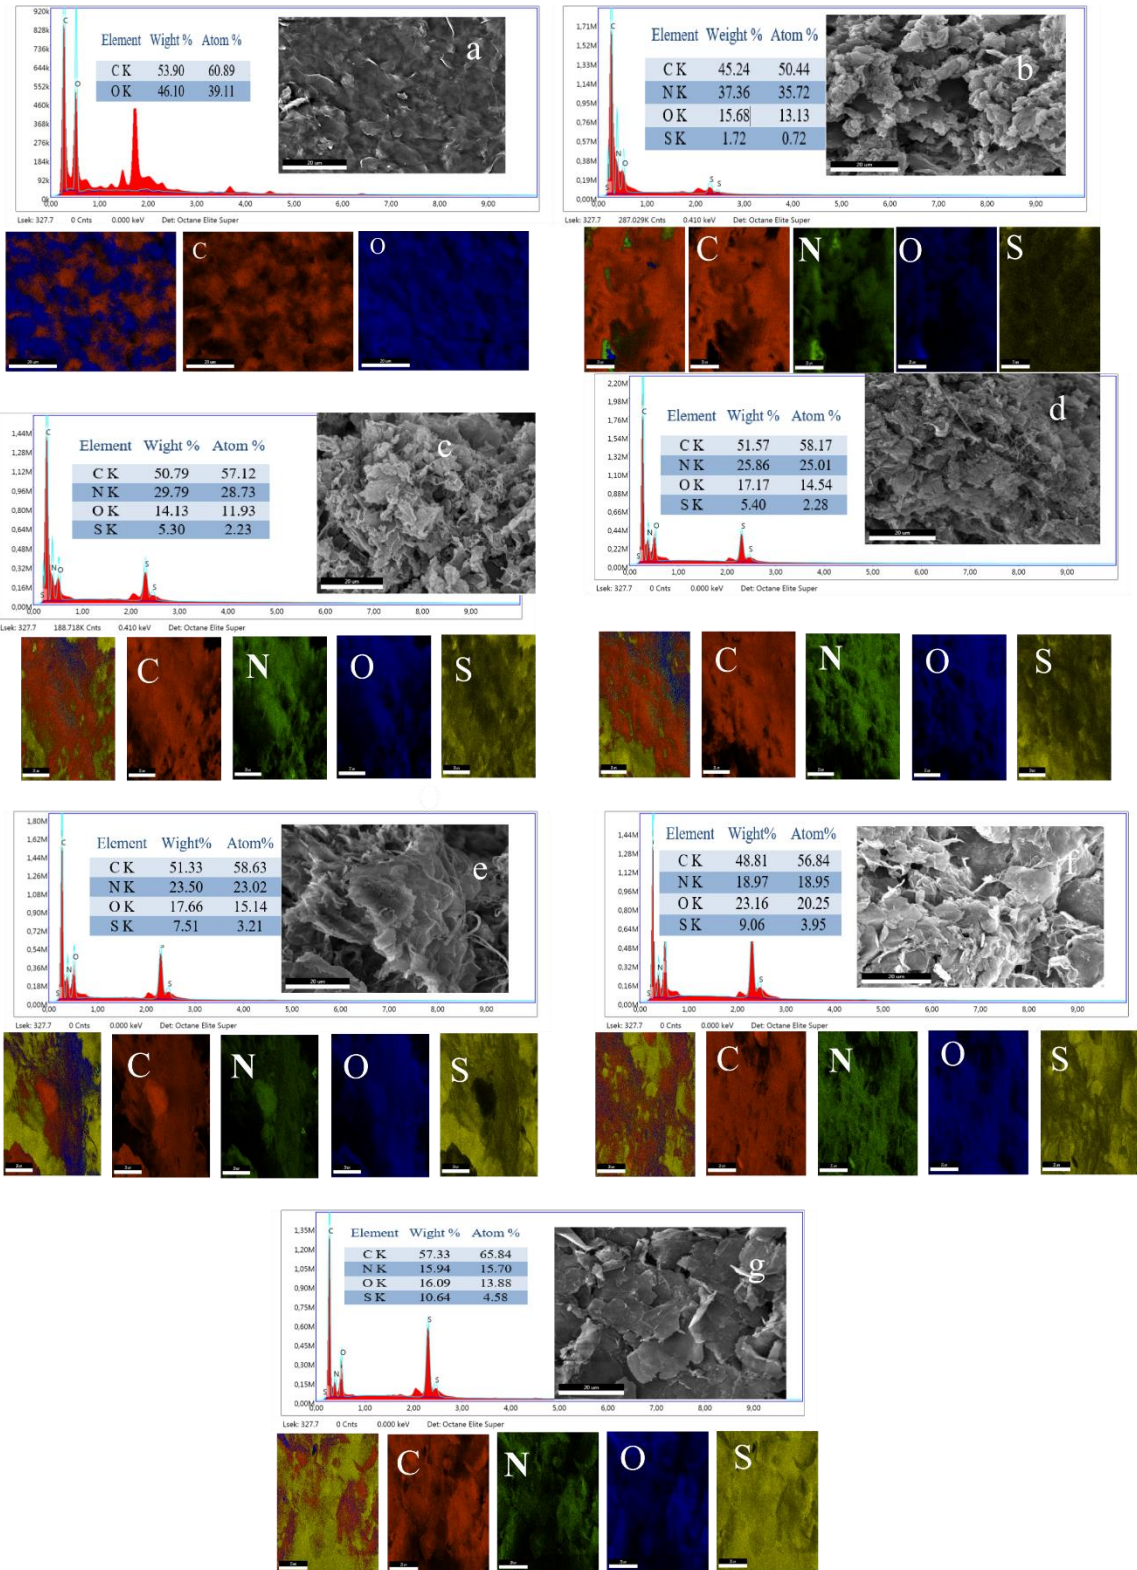

**Figure S1.** Elemental analysis and mapping of a) GO, b) PANI, c) PANI-GO-1, d) PANI-GO-4, e) PANI-GO-nanocomposite, f) PANI-GO-8, g) PANI-GO-10.

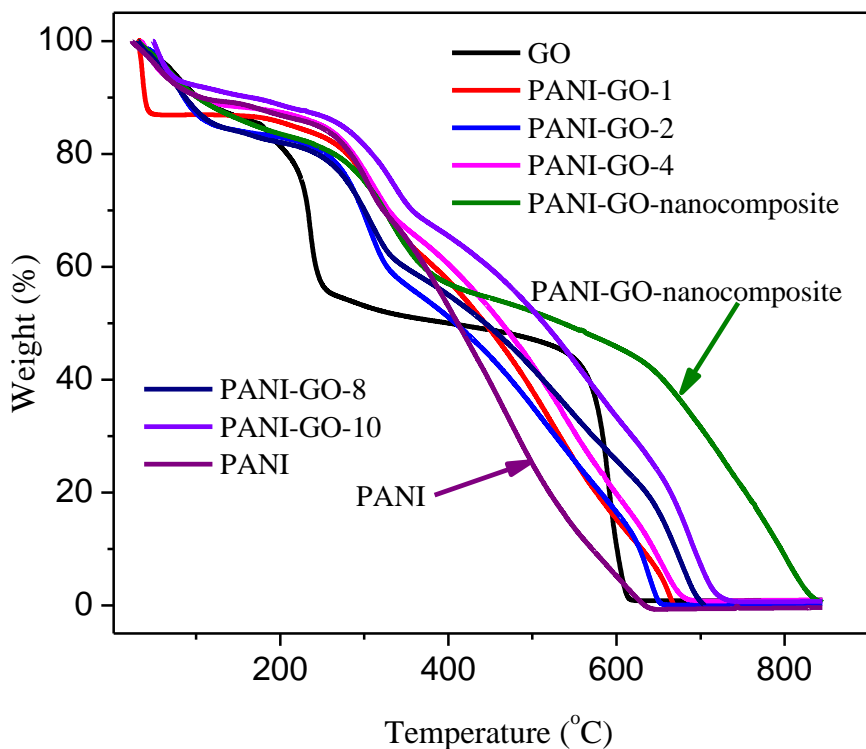

**Figure S2.** Thermo Gravimetric Analysis curves of GO, PANI and PANI-GO composites.

**Table 1.** Weight loss steps of GO, PANI and PANI-GO composites.

| Sample                | Up to temperature °C (% weight loss) |             |            |             |
|-----------------------|--------------------------------------|-------------|------------|-------------|
|                       | First step                           | Second step | Third step | Fourth step |
| GO                    | 191(17)                              | 251(28)     | 541(11)    | 615(43.22)  |
| PANI                  | 94(10)                               | 260(6)      | 639(84)    |             |
| PANI-GO-1             | 44(13)                               | 257(5)      | 333(17)    | 664 (64.22) |
| PANI-GO-2             | 97(15)                               | 242(4)      | 319(20)    | 649(59.7)   |
| PANI-GO-4             | 80(9)                                | 254(6)      | 331(19)    | 678(64.5)   |
| PANI-GO-nanocomposite | 97(11)                               | 265(9)      | 351(29)    | 825(58.62)  |
| PANI-GO-8             | 109(14)                              | 248(7)      | 328(17)    | 729(61.22)  |
| PANI-GO-10            | 71(6)                                | 284(8)      | 351(15)    | 615(69)     |

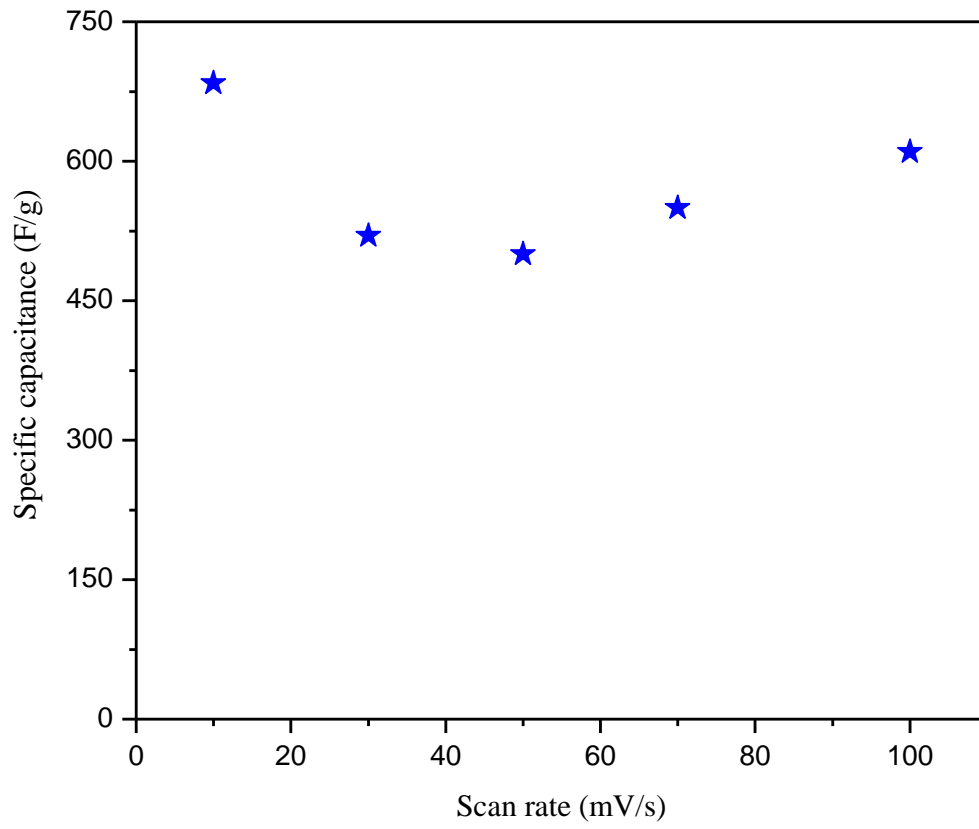

Figure S3. Specific capacitance vs scan rates.

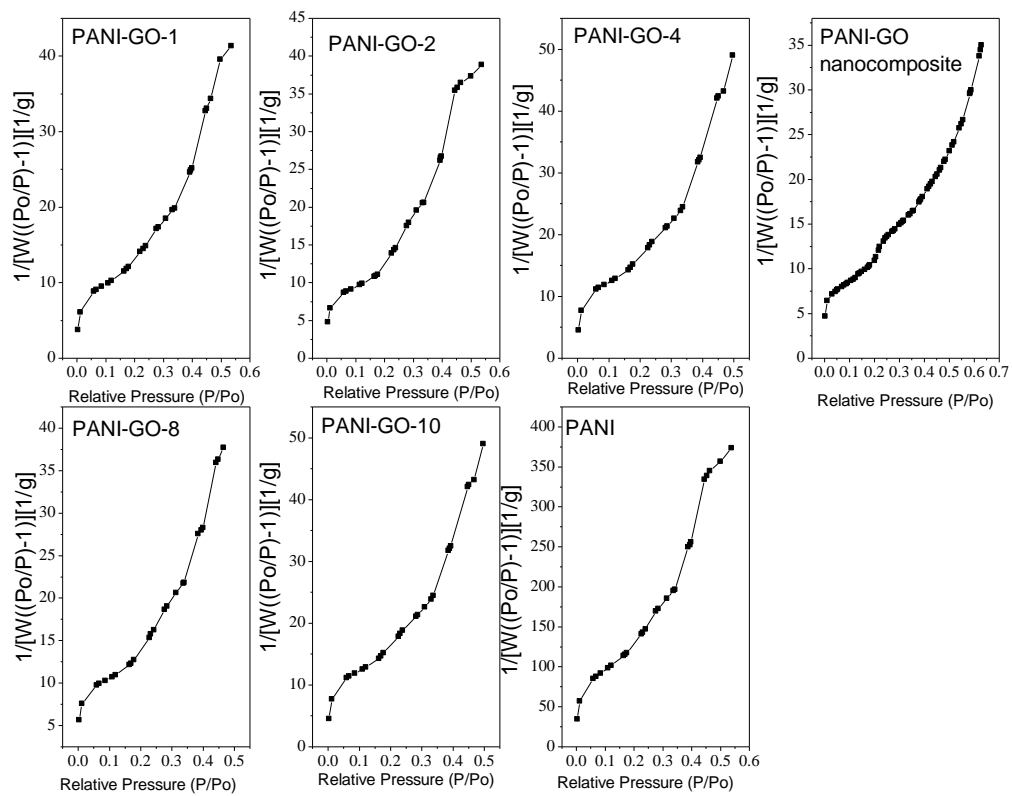

Figure S4. Brunauer-Emmett-Teller (BET) surface area.
